# Supplementary material for: Laser-Ablative Aqueous Synthesis and Characterization of Elemental Boron Nanoparticles for Biomedical Applications
Source: Research Square preprint supplement (doi:10.21203/rs.3.rs-1214985/v1), 2022-01-19
Supplement: Supplementary file 1 [file ac8a6d48293f463710711750.docx]

**Supplementary Information**

**Laser-Ablative Aqueous Synthesis and Characterization of Elemental Boron Nanoparticles for Biomedical Applications**

# Andrei I. Pastukhov1, Iaroslav B. Belyaev2,3, Julia C. Bulmahn4, Ivan V. Zelepukin2,3, Anton A. Popov2, Irina N. Zavestovskaya2,5, Sergei M. Klimentov2, Sergey M. Deyev2,3, Paras N. Prasad2,4*and Andrei V. Kabashin1,2*

1Aix Marseille University, CNRS, LP3, Campus de Luminy, Case 917, 13288, Marseille, France

2MEPHI, Institute of Engineering Physics for Biomedicine (PhysBio), 115409 Moscow, Russia

3Shemyakin–Ovchinnikov Institute of Bioorganic Chemistry, Russian Academy of Sciences, 16/10 Miklukho-Maklaya St, Moscow, 117997, Russia

4University at Buffalo, The State University of New York, Department of Chemistry and the Institute for Lasers, Photonics, and Biophotonics, Buffalo, New York 14260, United States

5P. N. Lebedev Physical Institute of the Russian Acad. Sci., Leninskiy Pr. 53, 119991 Moscow, Russia

*[pnprasad@buffalo.edu](mailto:pnprasad@buffalo.edu), [andrei.kabashin@univ-amu.fr](mailto:andrei.kabashin@univ-amu.fr)


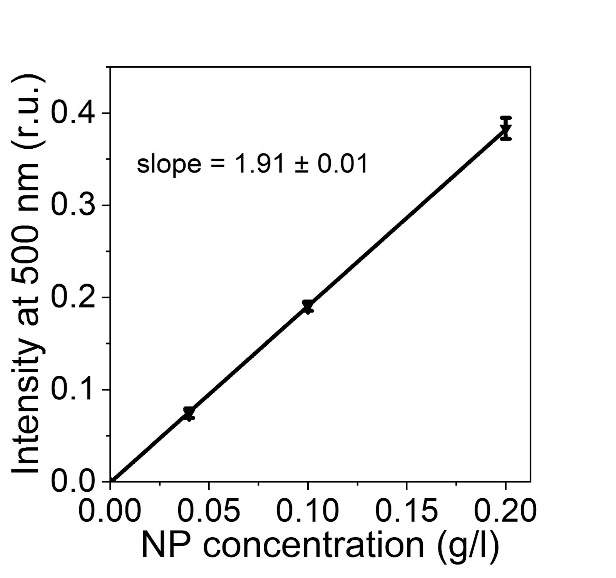


**Figure S1.** Calibration curve of the absorbance intensity of boron NPs at 500 nm in water versus concentration (n=3).
